# Supplementary material
Source: MDPI journal article supplement (https://www.mdpi.com/1999-4907/12/12/1700)
Supplement: s1 [file s1]

## Supplementary material

**Table S1.** Statistics of fitted linear mixed effects models and periods with significant ( $p < 0.05$ ) differences in basal area increment data between living (ND) and dead trees according to Student's *t* tests.

| Site | Period    | Variable  | Estimate | SE    | <i>z</i> value | <i>p</i> | Years or periods with significant differences in growth between living and dead trees |
|------|-----------|-----------|----------|-------|----------------|----------|---------------------------------------------------------------------------------------|
| CA   | 1950–2019 | Intercept | 0.460    | 0.086 | 0.002          | 1.0 e-07 | 1950–1954, 1961–1965, 1980–1999, 2002–2006, 2012–2015                                 |
|      |           | ND        | -0.002   | 0.106 | -0.018         | 0.254    |                                                                                       |
|      |           | year      | 0.007    | 0.002 | 2.864          | 0.004    |                                                                                       |
| CO   | 1950–2012 | Intercept | 1.521    | 0.158 | 9.627          | 2.0 e-16 | 1967–1969, 1973–2012                                                                  |
|      |           | ND        | -0.703   | 0.179 | -4.001         | 6.3 e-05 |                                                                                       |
|      |           | year      | -0.006   | 0.002 | -4.283         | 1.8 e-05 |                                                                                       |
| OR   | 1950–2016 | Intercept | -0.777   | 0.045 | -17.329        | 1.0 e-16 | 1967–2007, 2011–2015                                                                  |
|      |           | ND        | 0.010    | 0.062 | 0.160          | 0.872    |                                                                                       |
|      |           | year      | 0.004    | 0.002 | 2.472          | 0.013    |                                                                                       |
| MI   | 1950–2019 | Intercept | 0.828    | 0.048 | -9.950         | 1.7 e-12 | 1972–1976, 1980–1985, 1990–1994, 1999–2000, 2005–2006, 2017–2018                      |
|      |           | ND        | 0.006    | 0.068 | 0.116          | 0.907    |                                                                                       |
|      |           | year      | -0.009   | 0.002 | -3.637         | 6.7 e-08 |                                                                                       |
| PE   | 1980–2010 | Intercept | -0.159   | 0.069 | -2.897         | 0.022    | 1984–1986, 2002, 2006–2010                                                            |
|      |           | ND        | 0.046    | 0.100 | 0.484          | 0.629    |                                                                                       |
|      |           | year      | -0.002   | 0.009 | -1.435         | 0.810    |                                                                                       |
| SL   | 1980–2010 | Intercept | -0.011   | 0.082 | -0.240         | 0.887    | 1988–1997, 1999–2010                                                                  |
|      |           | ND        | -0.063   | 0.106 | -0.596         | 0.551    |                                                                                       |
|      |           | year      | -0.026   | 0.009 | -2.956         | 0.030    |                                                                                       |

**Table S2.** Statistics of models of basal area increment fitted to each site. The two last columns show the increment in the corrected Akaike information criterion (AICc) and the relative Akaike weight. The symbol “+” indicates that the effect was included in the selected model.

| Site | Intercept | Dbh  | SPEI | Status | year   | SPEI x status | Status x year | $\Delta\text{AICc}$ | Akaike weight |
|------|-----------|------|------|--------|--------|---------------|---------------|---------------------|---------------|
| CA   | -1.17     | 0.01 | 0.09 | +      | 0.001  | +             | +             | 1.59                | 0.30          |
| CO   | 5.15      |      | 0.13 | +      | 0.002  | +             | +             | 0.00                | 0.97          |
| MI   | 5.50      | 0.02 | 0.06 | +      | 0.003  | +             | +             | 0.00                | 1.00          |
| OR   | 5.44      | 0.01 | 0.09 | +      | 0.002  | +             |               | 0.00                | 0.44          |
| PE   | 20.15     |      | 0.06 | +      | -0.010 | +             |               | 0.34                | 0.18          |
| SL   | 10.60     | 0.01 | 0.05 | +      | -0.005 | +             | +             | 0.27                | 0.47          |

**Table S3.** Estimated differences in the interactions between basal area increment (BAI) and time (year) or the SPEI drought index between living and dead trees in the study sites. The columns show the estimated coefficient, its standard error (SE) and the significance level ( $p$ ).

| Contrast D-ND | Species              | Site | Estimate | SE    | $p$    |
|---------------|----------------------|------|----------|-------|--------|
| BAI x Year    | <i>P. sylvestris</i> | CA   | -6.39    | 1.63  | <0.001 |
|               |                      | CO   | -2.72    | 0.83  | 0.001  |
|               | <i>P. pinaster</i>   | OR   | 0.81     | 0.95  | 0.391  |
|               |                      | MI   | -1.79    | 0.44  | <0.001 |
|               | <i>P. halepensis</i> | PE   | -0.96    | 1.39  | 0.492  |
|               |                      | SL   | -14.2    | 1.44  | <0.001 |
|               | All sites            | –    | -5.98    | 0.54  | <0.001 |
| BAI x SPEI    | <i>P. sylvestris</i> | CA   | -0.003   | 0.005 | 0.519  |
|               |                      | CO   | -0.012   | 0.004 | 0.001  |
|               | <i>P. pinaster</i>   | OR   | -0.007   | 0.004 | 0.043  |
|               |                      | MI   | -0.014   | 0.003 | <0.001 |
|               | <i>P. halepensis</i> | PE   | -0.003   | 0.008 | 0.122  |
|               |                      | SL   | -0.024   | 0.004 | <0.001 |
|               | All sites            | –    | -0.012   | 0.002 | <0.001 |

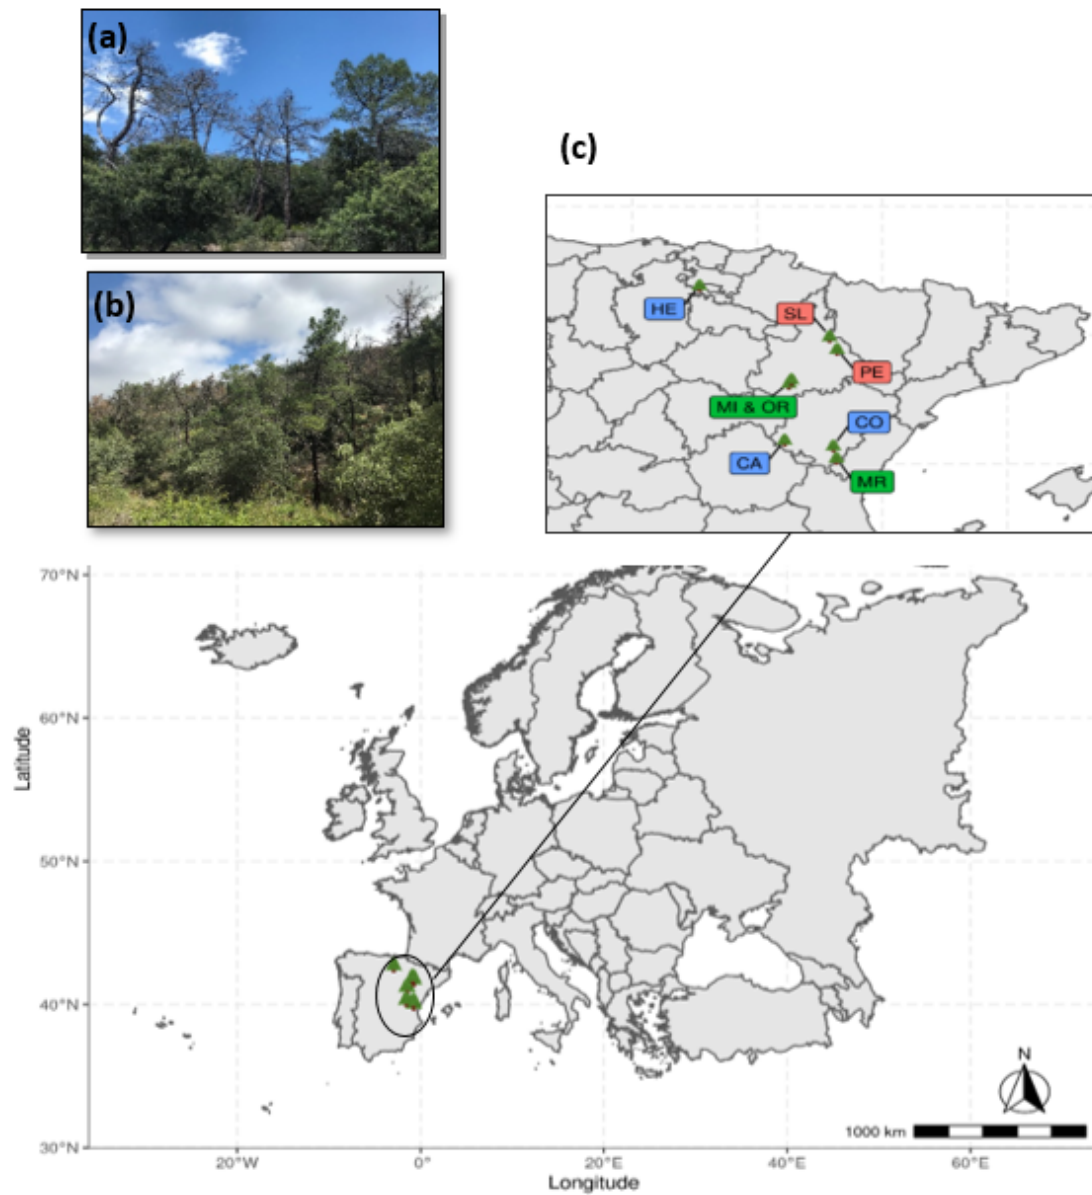

**Figure S1.** Location of the eight sampled sites (tree icons) in north-eastern Spain (see sites' coordinates in Table 1). Pictures showed (a) dead and (b) surviving *P. pinaster* trees in Orera and Miedes sites and (c) a zoom-in on the study area in Spain. Pine species are defined by labels' colours: *P. sylvestris* blue, *P. pinaster* green, and *P. halepensis* red. Sites' abbreviations are: HE, Hereña; CA, Calomarde; CO, Corbalán; MI, Miedes; OR, Orera; MR, Mora de Rubielos; PE, Peñaflo; and SL, Sierra de Luna.

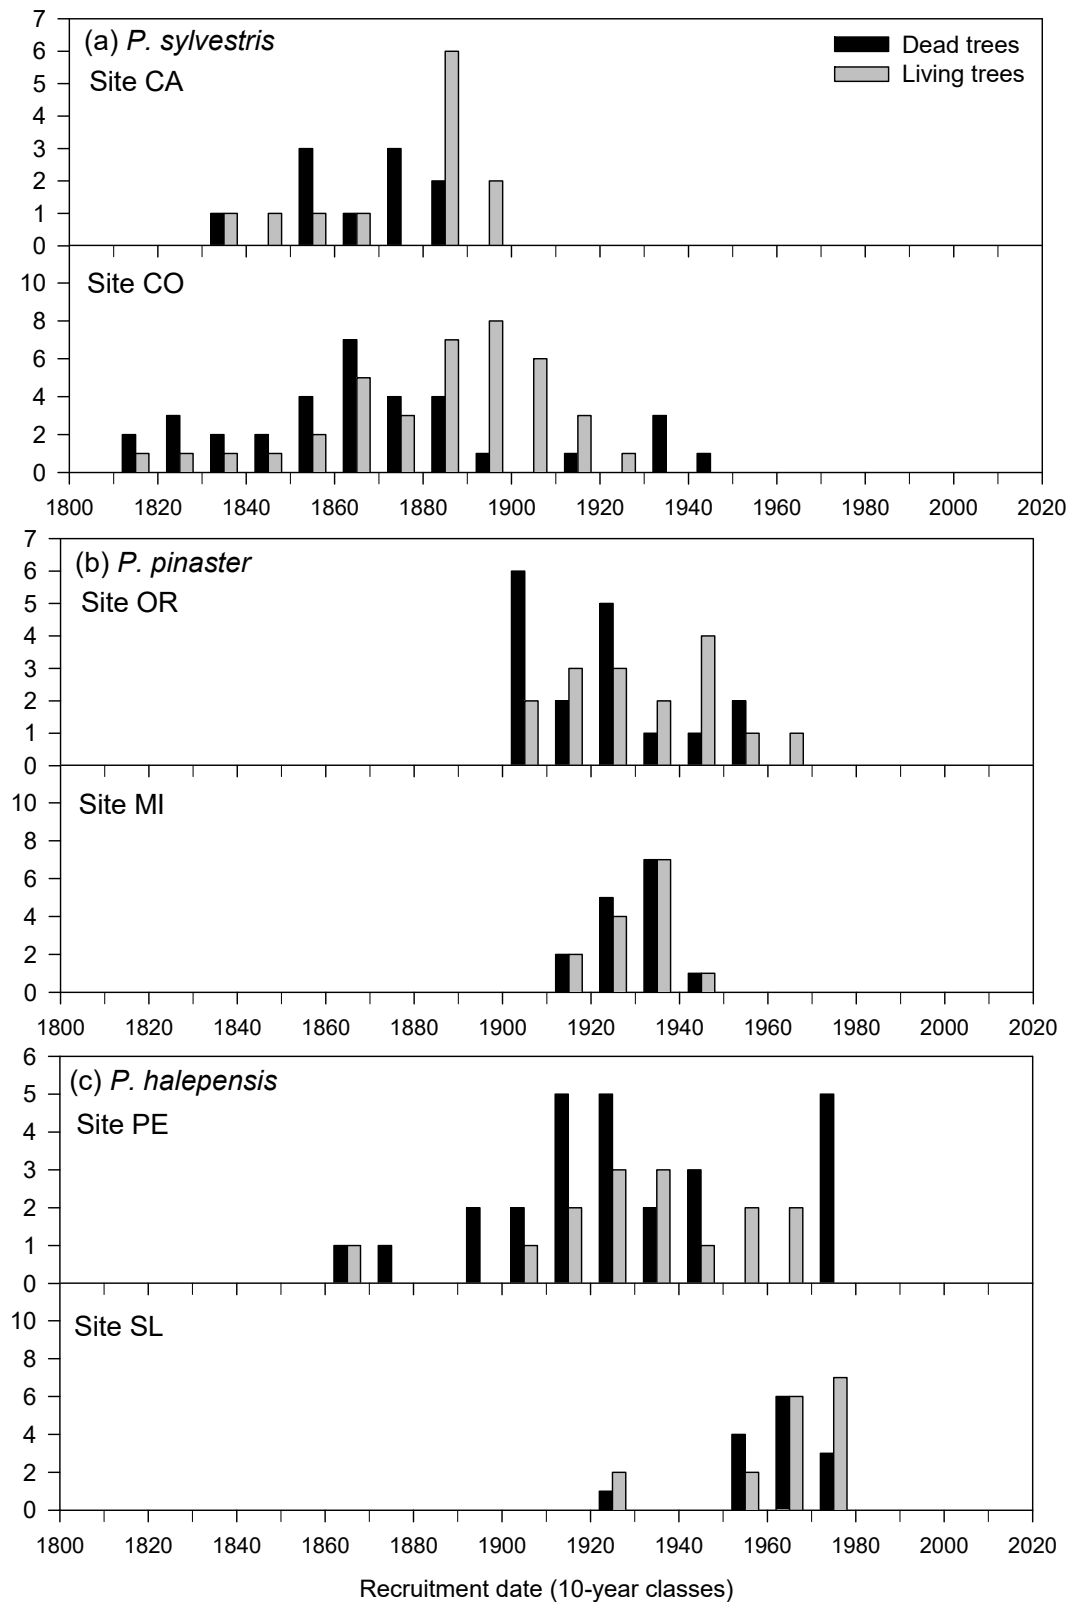

**Figure S2.** Recruitment histograms of dead and living trees considering 10-year classes. The y-axis represents the number of individuals. Sites are: CA (Calomarde), CO (Corbalán), OR (Orera), MI (Miedes), PE (Peñaflor) and SL (Sierra Luna).

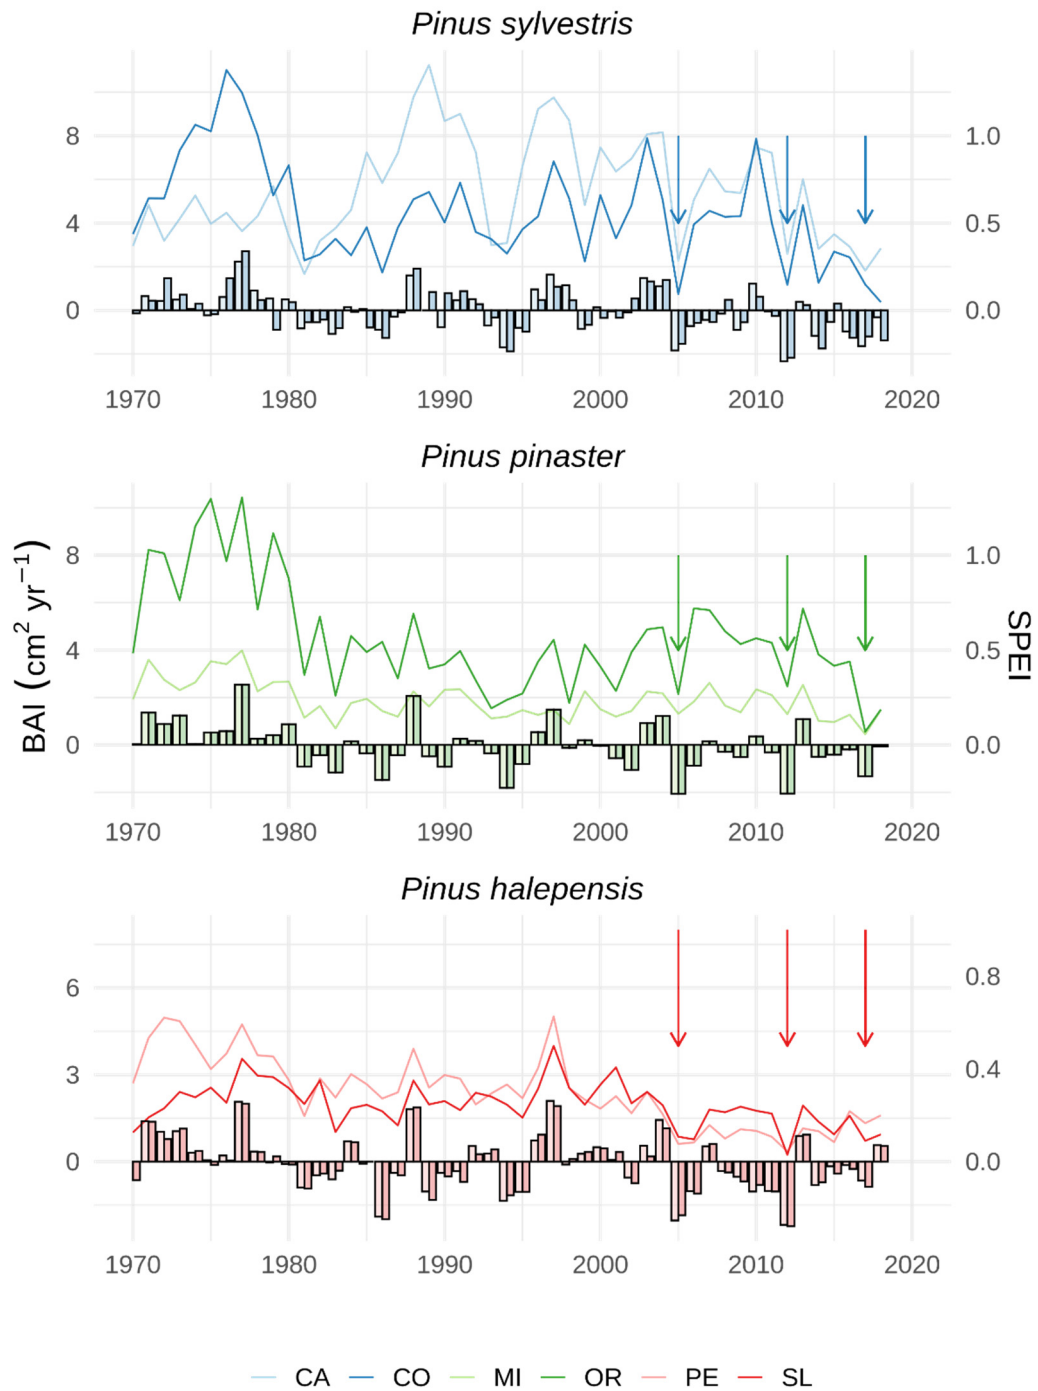

**Figure S3.** Basal area increment (lines) and SPEI values (columns) in the six study sites according to study species. Note that the SPEI values are the same for the two nearby *P. pinaster* sites. Arrows show the 2005, 2012 and 2017 droughts. Sites are: CA (Calomarde), CO (Corbalán), MI (Miedes), OR (Orera), PE (Peñaflor) and SL (Sierra Luna).

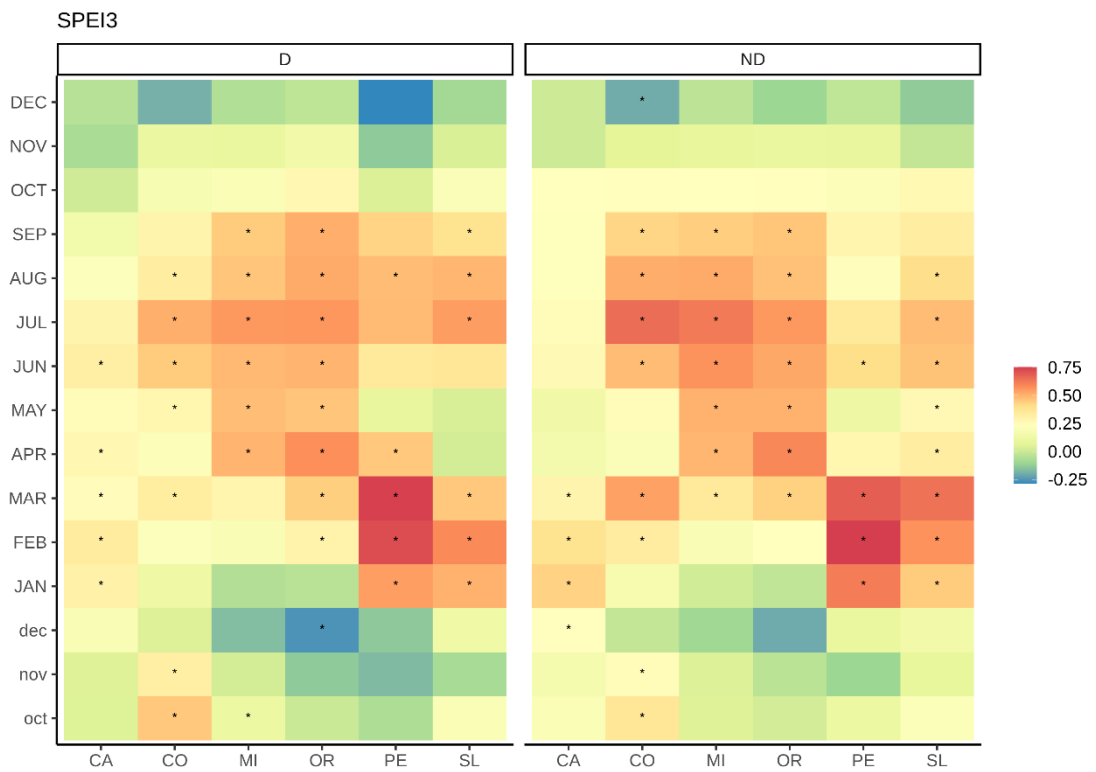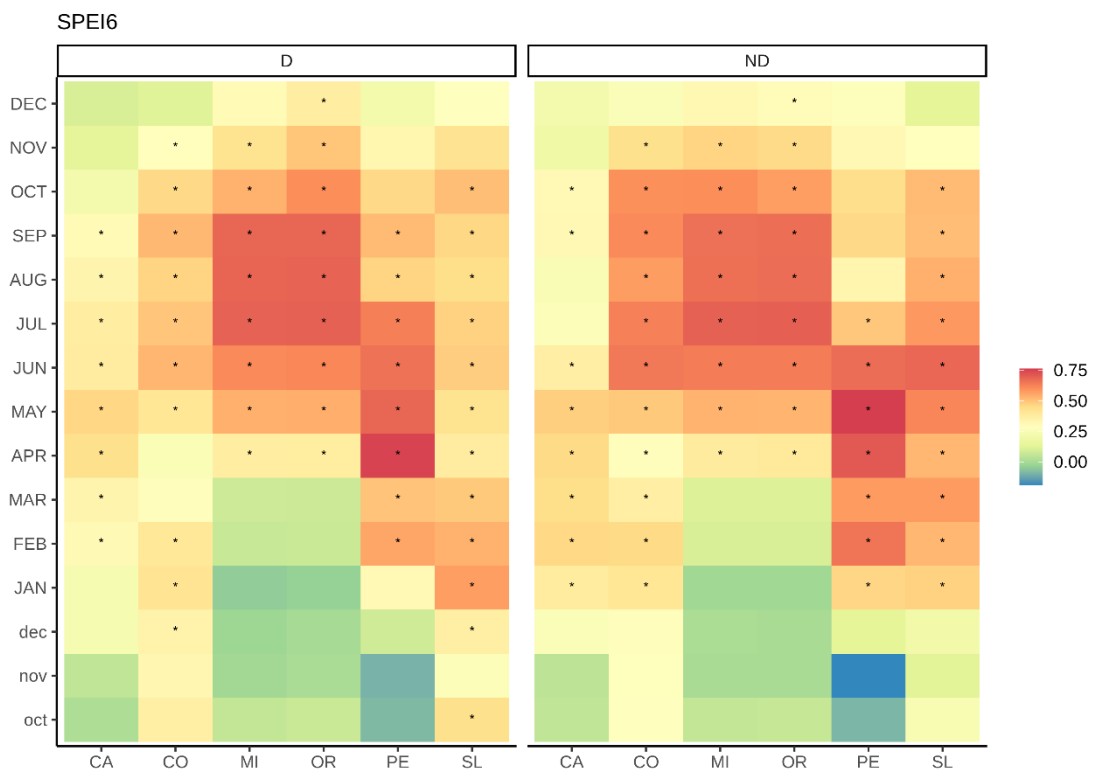

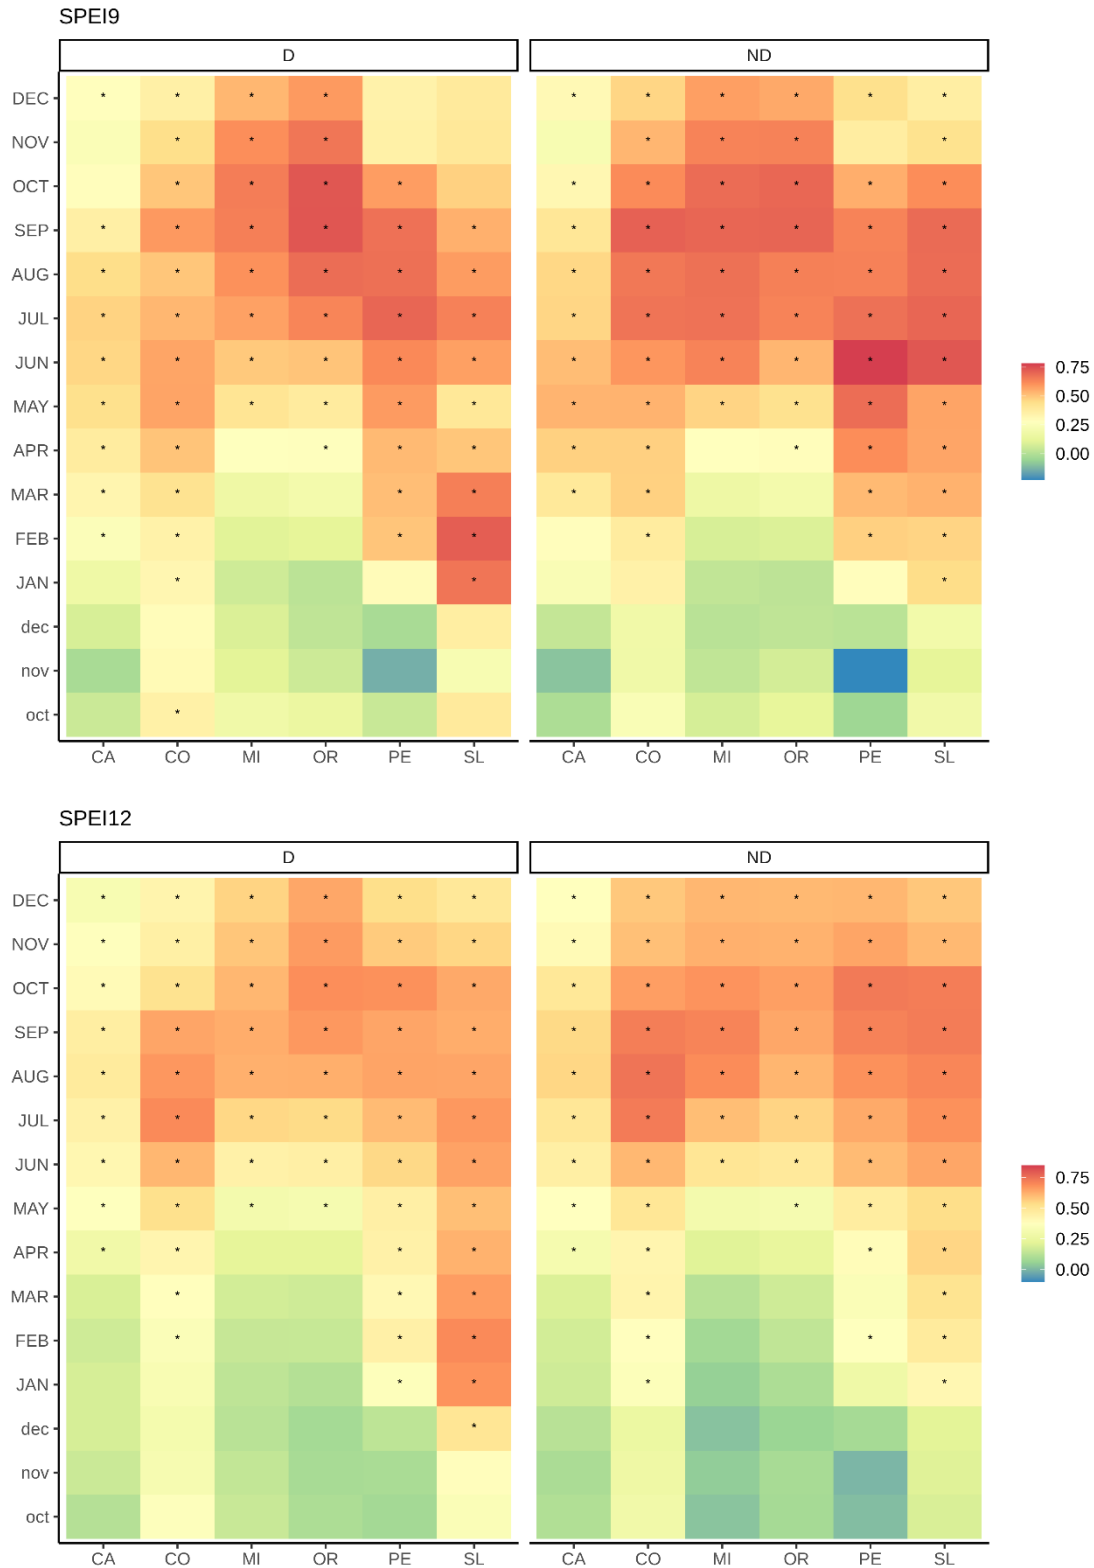

**Figure S4.** Pearson correlations (color scale) obtained by relating the detrended basal area increment series and the SPEI drought index in six study sites (x axes). Correlations were calculated from previous October (oct) to current December (DEC) considering 3- (SPEI3), 6- (SPEI6), 9- (SPEI9) and 12-month (SPEI12) SPEI values. Significant correlations ( $p < 0.05$ ) are indicated with a dot (.). Sites are: CA (Calomarde), CO (Corbalán), MI (Miedes), OR (Orera), PE (Peñaflor) and SL (Sierra Luna).
